# Supplementary material for: Antihyperglycemic Activity ofEucalyptus tereticornisin Insulin-Resistant Cells and a Nutritional Model of Diabetic Mice
Source: Hindawi journal article supplement (doi:10.1155/2015/418673), 2015-01-01
Supplement: f1 [file 418673.f1.pdf]

# Supporting figure S1. Effect of crude and solvent extracts on glucose Uptake using cultured C<sub>2</sub>C<sub>12</sub> Myotubes.

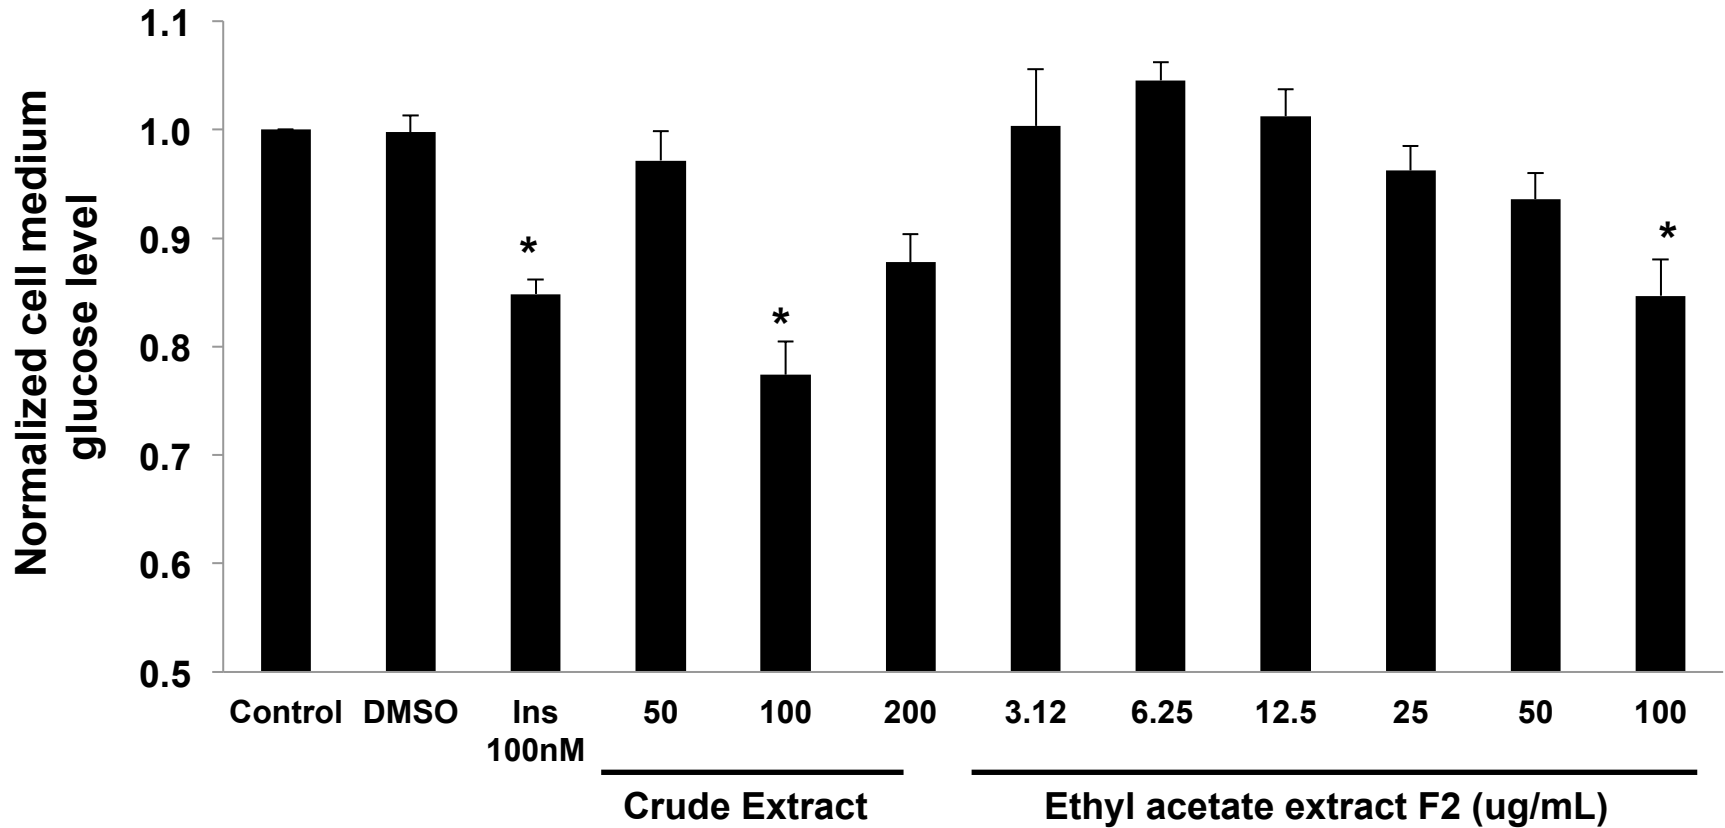

**Supporting Table 1.**  
Primers used for qRT-PCR

| <b>Gene</b>                    | <b>PRIMERS</b>                     |
|--------------------------------|------------------------------------|
| <b>G6Pasa</b>                  | Forward: TTACCAAGACTCCCAGGACTG     |
|                                | Reverse: GAGCTGTTGCTGTAGTAGTCG     |
| <b>MCP-1</b>                   | Forward: GCATCCACGTGTTGGCTCA       |
|                                | Reverse: CTCCAGCCTACTCATTGGGATCA   |
| <b>TNF-<math>\alpha</math></b> | Forward: GCCTCTTCTCATTCTGCTTG      |
|                                | Reverse: CTGATGAGAGGGAGGCCATT      |
| <b>IL-1<math>\beta</math></b>  | Forward: CAACCAACAAGTGATATTCTCCATG |
|                                | Reverse: GATCCACACTCTCCAGCTGCA     |
| <b>IL-6</b>                    | Forward: GAGGATACCACTCCCAACAGACC   |
|                                | Reverse: AAGTGCATCATCGTTGTTCATACA  |
| <b>GAPDH</b>                   | Forward: TCACCACCATGGAGAAGGC       |
|                                | Reverse: GCTAAGCAGTTGGTGGTGCA      |
